# Supplementary material for: Using Land Runoff To Survey the Distribution and Genetic Diversity of Burkholderia pseudomallei Strains in Vientiane, Laos
Source: PubMed Central journal article supplement (PMC7851688; doi:10.1128/aem.02112-20), 2021-01-29
Supplement: AEM.02112-20-s0001.pdf [file AEM.02112-20-s0001.pdf]

## Supplementary Data

**Table S1-** The 199 *B. pseudomallei* genomes used in this study.

| <i>B. pseudomallei</i> strain | Country of Origin | Accession no | Genome Reference (if applicable)                    |
|-------------------------------|-------------------|--------------|-----------------------------------------------------|
| MSHR0116                      | Australia         | ERR311040    | Chewapreecha et al. Nat Microbiol 2017 (2):16263    |
| MSHR0210                      | Australia         | ERR311043    | Chewapreecha et al. Nat Microbiol 2017 (2):16263    |
| MSHR0253                      | Australia         | ERR311045    | Chewapreecha et al. Nat Microbiol 2017 (2):16263    |
| MSHR0287                      | Australia         | ERR311046    | Chewapreecha et al. Nat Microbiol 2017 (2):16263    |
| MSHR0356                      | Australia         | ERR311049    | Chewapreecha et al. Nat Microbiol 2017 (2):16263    |
| MSHR0445a                     | Australia         | ERR311050    | Chewapreecha et al. Nat Microbiol 2017 (2):16263    |
| MSHR0447                      | Australia         | ERR311052    | Chewapreecha et al. Nat Microbiol 2017 (2):16263    |
| MSHR0668                      | Australia         | SRR1617372   | Price EP et al. Curr Trop Med Rep 4:95-102          |
| MSHR0690                      | Australia         | ERR311057    | Chewapreecha et al. Nat Microbiol 2017 (2):16263    |
| MSHR0710                      | Australia         | ERR311058    | Chewapreecha et al. Nat Microbiol 2017 (2):16263    |
| MSHR0720                      | Australia         | ERR311059    | Chewapreecha et al. Nat Microbiol 2017 (2):16263    |
| MSHR0867                      | Australia         | ERR311061    | Chewapreecha et al. Nat Microbiol 2017 (2):16263    |
| MSHR0911                      | Australia         | ERR311062    | Chewapreecha et al. Nat Microbiol 2017 (2):16263    |
| MSHR1153                      | Australia         | SRR2875414   | Johnson et al. Genome Announc. 2015 3(1): e01282-14 |
| MSHR1200                      | Australia         | ERR539740    | Chewapreecha et al. Nat Microbiol 2017 (2):16263    |
| MSHR1333                      | Australia         | ERR539742    | Chewapreecha et al. Nat Microbiol 2017 (2):16263    |
| MSHR1455                      | Australia         | ERR539744    | Chewapreecha et al. Nat Microbiol 2017 (2):16263    |
| MSHR1555                      | Australia         | ERR539745    | Chewapreecha et al. Nat Microbiol 2017 (2):16263    |
| MSHR1768                      | Australia         | ERR539750    | Chewapreecha et al. Nat Microbiol 2017 (2):16263    |
| MSHR1879                      | Australia         | ERR539751    | Chewapreecha et al. Nat Microbiol 2017 (2):16263    |
| MSHR1888                      | Australia         | ERR539752    | Chewapreecha et al. Nat Microbiol 2017 (2):16263    |
| MSHR2089                      | Australia         | ERR539755    | Chewapreecha et al. Nat Microbiol 2017 (2):16263    |
| MSHR2141                      | Australia         | ERR298341    | Chewapreecha et al. Nat Microbiol 2017 (2):16263    |
| MSHR2178                      | Australia         | ERR539756    | Chewapreecha et al. Nat Microbiol 2017 (2):16263    |
| MSHR2189                      | Australia         | ERR539757    | Chewapreecha et al. Nat Microbiol 2017 (2):16263    |
| MSHR2232                      | Australia         | ERR539758    | Chewapreecha et al. Nat Microbiol 2017 (2):16263    |
| MSHR2265                      | Australia         | ERR539759    | Chewapreecha et al. Nat Microbiol 2017 (2):16263    |
| MSHR2543                      | Australia         | ERR539761    | Chewapreecha et al. Nat Microbiol 2017 (2):16263    |

|                 |              |                      |                                                  |
|-----------------|--------------|----------------------|--------------------------------------------------|
| MSHR3497        | Australia    | ERR539764            | Chewapreecha et al. Nat Microbiol 2017 (2):16263 |
| MSHR4004        | Australia    | ERR298343            | Chewapreecha et al. Nat Microbiol 2017 (2):16263 |
| MSHR498         | Australia    | ERR298340            | Chewapreecha et al. Nat Microbiol 2017 (2):16263 |
| MSHR504         | Australia    | ERR298342            | Chewapreecha et al. Nat Microbiol 2017 (2):16263 |
| MSHR5477        | Australia    | ERR298344            | Chewapreecha et al. Nat Microbiol 2017 (2):16263 |
| MSHR5619        | Australia    | ERR298346            | Chewapreecha et al. Nat Microbiol 2017 (2):16263 |
| 6_CDC           | Bangladesh   | ERR311033            | Chewapreecha et al. Nat Microbiol 2017 (2):16263 |
| H034580128      | Bangladesh   | ERR298750            | Chewapreecha et al. Nat Microbiol 2017 (2):16263 |
| H061220286      | Bangladesh   | ERR298751            | Chewapreecha et al. Nat Microbiol 2017 (2):16263 |
| H103520155      | Bangladesh   | ERR298752            | Chewapreecha et al. Nat Microbiol 2017 (2):16263 |
| SID2889         | Bangladesh   | ERR298747            | Chewapreecha et al. Nat Microbiol 2017 (2):16263 |
| SID3811         | Bangladesh   | ERR298748            | Chewapreecha et al. Nat Microbiol 2017 (2):16263 |
| SID4717         | Bangladesh   | ERR298749            | Chewapreecha et al. Nat Microbiol 2017 (2):16263 |
| 4900CFPatient1  | Brazil       | ARZE00000000         | Gee et al., Emerg Infect Dis 2014 20(4):682-84   |
| BCC215          | Brazil       | ABBR00000000         | Gee et al., Emerg Infect Dis 2014 20(4):682-84   |
| H061740680      | Brazil       | ERR298754            | Chewapreecha et al. Nat Microbiol 2017 (2):16263 |
| SID1615         | Brazil       | ERR298753            | Chewapreecha et al. Nat Microbiol 2017 (2):16263 |
| SID1131         | Brunei       | ERR298755            | Chewapreecha et al. Nat Microbiol 2017 (2):16263 |
| BF103; MSHR7964 | Burkina Faso | SRR3145394           | Sarovich et al mSphere 2016 1(2): e00089-15      |
| BF111; MSHR7965 | Burkina Faso | SRR3145395           | Sarovich et al mSphere 2016 1(2): e00089-15      |
| NT_20           | Burkina_Faso | ERR298756            | Chewapreecha et al. Nat Microbiol 2017 (2):16263 |
| CAM41           | Cambodia     | ERR539773            | Chewapreecha et al. Nat Microbiol 2017 (2):16263 |
| E562            | Cambodia     | ERR178253            | Chewapreecha et al. Nat Microbiol 2017 (2):16263 |
| E569            | Cambodia     | ERR178254            | Chewapreecha et al. Nat Microbiol 2017 (2):16263 |
| SHCH2430        | Cambodia     | ERR298360            | Chewapreecha et al. Nat Microbiol 2017 (2):16263 |
| SR-020          | Cambodia     | ERR178250            | Chewapreecha et al. Nat Microbiol 2017 (2):16263 |
| SR-025          | Cambodia     | ERR178251            | Chewapreecha et al. Nat Microbiol 2017 (2):16263 |
| SR-039          | Cambodia     | ERR178245            | Chewapreecha et al. Nat Microbiol 2017 (2):16263 |
| 5691            | Chad         | ERR298779            | Chewapreecha et al. Nat Microbiol 2017 (2):16263 |
| MSHR6969        | Chad         | ERR298347            | Chewapreecha et al. Nat Microbiol 2017 (2):16263 |
| BPC006          | China        | NC_018527, NC_018529 | Fang et al., 2012 J Bacteriol 194(23) 6604-05    |
| E0698           | China        | ERR539770            | Chewapreecha et al. Nat Microbiol 2017 (2):16263 |
| E0702           | China        | ERR539771            | Chewapreecha et al. Nat Microbiol 2017 (2):16263 |

|            |           |              |                                                  |
|------------|-----------|--------------|--------------------------------------------------|
| Hainan_106 | China     | ERR298758    | Chewapreecha et al. Nat Microbiol 2017 (2):16263 |
| Hainan1    | China     | ERR298757    | Chewapreecha et al. Nat Microbiol 2017 (2):16263 |
| HK2        | China     | ERR539766    | Chewapreecha et al. Nat Microbiol 2017 (2):16263 |
| OP285A     | China     | ERR539769    | Chewapreecha et al. Nat Microbiol 2017 (2):16263 |
| OP79A      | China     | ERR539767    | Chewapreecha et al. Nat Microbiol 2017 (2):16263 |
| 7893       | Ecuador   | ERR351982    | Chewapreecha et al. Nat Microbiol 2017 (2):16263 |
| MSHR0142   | Fiji      | ERR311042    | Chewapreecha et al. Nat Microbiol 2017 (2):16263 |
| MSHR3020   | Fiji      | ERR539763    | Chewapreecha et al. Nat Microbiol 2017 (2):16263 |
| C2_Bp      | Gabon     | ERR403714    | Chewapreecha et al. Nat Microbiol 2017 (2):16263 |
| Gabon_Bp   | Gabon     | ERR403716    | Chewapreecha et al. Nat Microbiol 2017 (2):16263 |
| G9709      | India     | ERR311037    | Chewapreecha et al. Nat Microbiol 2017 (2):16263 |
| H054640145 | India     | ERR298759    | Chewapreecha et al. Nat Microbiol 2017 (2):16263 |
| H103360117 | India     | ERR298760    | Chewapreecha et al. Nat Microbiol 2017 (2):16263 |
| MSHR2056   | Indonesia | ERR539754    | Chewapreecha et al. Nat Microbiol 2017 (2):16263 |
| MM24       | Laos      | ERR162597    | Chewapreecha et al. Nat Microbiol 2017 (2):16263 |
| MM28       | Laos      | ERR162604    | Chewapreecha et al. Nat Microbiol 2017 (2):16263 |
| MM37       | Laos      | ERR162603    | Chewapreecha et al. Nat Microbiol 2017 (2):16263 |
| MM39       | Laos      | ERR162598    | Chewapreecha et al. Nat Microbiol 2017 (2):16263 |
| MM45       | Laos      | ERR162599    | Chewapreecha et al. Nat Microbiol 2017 (2):16263 |
| MM54       | Laos      | ERR162601    | Chewapreecha et al. Nat Microbiol 2017 (2):16263 |
| MM56       | Laos      | ERR162605    | Chewapreecha et al. Nat Microbiol 2017 (2):16263 |
| MM70       | Laos      | ERR162607    | Chewapreecha et al. Nat Microbiol 2017 (2):16263 |
| MM76       | Laos      | ERR162606    | Chewapreecha et al. Nat Microbiol 2017 (2):16263 |
| MM80       | Laos      | ERR162608    | Chewapreecha et al. Nat Microbiol 2017 (2):16263 |
| MM85       | Laos      | ERR162600    | Chewapreecha et al. Nat Microbiol 2017 (2):16263 |
| MM91       | Laos      | ERR162602    | Chewapreecha et al. Nat Microbiol 2017 (2):16263 |
| SVC_34     | Laos      | ERR162611    | Chewapreecha et al. Nat Microbiol 2017 (2):16263 |
| SVE_77     | Laos      | ERR162609    | Chewapreecha et al. Nat Microbiol 2017 (2):16263 |
| SVW_02     | Laos      | ERR162610    | Chewapreecha et al. Nat Microbiol 2017 (2):16263 |
| MSHR11966  | Laos      | SAMN15920931 | This study                                       |
| MSHR12103  | Laos      | SAMN15920932 | This study                                       |
| MSHR12336  | Laos      | SAMN15920933 | This study                                       |
| MSHR12338  | Laos      | SAMN15920934 | This study                                       |

|           |            |              |                                                  |
|-----------|------------|--------------|--------------------------------------------------|
| MSHR12369 | Laos       | SAMN15920935 | This study                                       |
| MSHR12077 | Laos       | SAMN15920936 | This study                                       |
| MSHR12020 | Laos       | SAMN15920937 | This study                                       |
| MSHR12347 | Laos       | SAMN15920938 | This study                                       |
| MSHR12414 | Laos       | SAMN15920939 | This study                                       |
| MSHR12000 | Laos       | SAMN15920940 | This study                                       |
| MSHR12071 | Laos       | SAMN15920941 | This study                                       |
| MSHR11998 | Laos       | SAMN15920942 | This study                                       |
| MSHR11836 | Laos       | SAMN15920943 | This study                                       |
| MSHR12048 | Laos       | SAMN15920944 | This study                                       |
| MSHR12046 | Laos       | SAMN15920945 | This study                                       |
| MSHR11846 | Laos       | SAMN15920946 | This study                                       |
| MSHR12097 | Laos       | SAMN15920947 | This study                                       |
| MSHR12122 | Laos       | SAMN15920948 | This study                                       |
| MSHR11848 | Laos       | SAMN15920949 | This study                                       |
| MSHR12054 | Laos       | SAMN15920950 | This study                                       |
| MSHR12059 | Laos       | SAMN15920951 | This study                                       |
| MSHR11855 | Laos       | SAMN15920952 | This study                                       |
| MSHR12061 | Laos       | SAMN15920953 | This study                                       |
| MSHR11859 | Laos       | SAMN15920954 | This study                                       |
| MSHR12012 | Laos       | SAMN15920955 | This study                                       |
| MSHR7966  | Madagascar | SRR3145396   | Sarovich et al. mSphere 2016 1(2): e00089-15     |
| LN_10     | Malaysia   | ERR298768    | Chewapreecha et al. Nat Microbiol 2017 (2):16263 |
| LN_22892  | Malaysia   | ERR298767    | Chewapreecha et al. Nat Microbiol 2017 (2):16263 |
| LN_29564  | Malaysia   | ERR298764    | Chewapreecha et al. Nat Microbiol 2017 (2):16263 |
| LN_31348  | Malaysia   | ERR298765    | Chewapreecha et al. Nat Microbiol 2017 (2):16263 |
| LN_34170  | Malaysia   | ERR298763    | Chewapreecha et al. Nat Microbiol 2017 (2):16263 |
| LN_34677  | Malaysia   | ERR298769    | Chewapreecha et al. Nat Microbiol 2017 (2):16263 |
| LN_6      | Malaysia   | ERR298766    | Chewapreecha et al. Nat Microbiol 2017 (2):16263 |
| MSHR0315  | Malaysia   | ERR311047    | Chewapreecha et al. Nat Microbiol 2017 (2):16263 |
| SID3783   | Malaysia   | ERR298771    | Chewapreecha et al. Nat Microbiol 2017 (2):16263 |
| SID4349   | Malaysia   | ERR298770    | Chewapreecha et al. Nat Microbiol 2017 (2):16263 |
| MSHR7398  | Martinique | ERR298357    | Chewapreecha et al. Nat Microbiol 2017 (2):16263 |

|               |                               |                    |                                                              |
|---------------|-------------------------------|--------------------|--------------------------------------------------------------|
| MSHR7400      | Martinique                    | ERR298359          | Chewapreecha et al. Nat Microbiol 2017 (2):16263             |
| Green         | Mauritius                     | ERR311038          | Chewapreecha et al. Nat Microbiol 2017 (2):16263             |
| IL2014_Mexico | Mexico                        | SRR7140691         | Donahue et al. Open Forum Infect Dis. 2019 6(2):ofz005       |
| MSHR7397      | New_Caledonia                 | ERR298356          | Chewapreecha et al. Nat Microbiol 2017 (2):16263             |
| MSHR7399      | New_Caledonia                 | ERR298358          | Chewapreecha et al. Nat Microbiol 2017 (2):16263             |
| H101180656    | Nigeria                       | ERR298772          | Chewapreecha et al. Nat Microbiol 2017 (2):16263             |
| MSHR0491      | Northern Territory, Australia | ERR311054          | Chewapreecha et al. Nat Microbiol 2017 (2):16263             |
| Pakistan9     | Pakistan                      | CP008754, CP008755 | Daligault et al., Genome Announc 2014 2(6):e01106-14         |
| G1467         | Papua New Guinea              | ERR311036          | Chewapreecha et al. Nat Microbiol 2017 (2):16263             |
| MSHR0141      | Papua New Guinea              | ERR311041          | Chewapreecha et al. Nat Microbiol 2017 (2):16263             |
| MSHR2434      | Papua New Guinea              | ERR539760          | Chewapreecha et al. Nat Microbiol 2017 (2):16263             |
| H110440887    | Philippines                   | ERR298777          | Chewapreecha et al. Nat Microbiol 2017 (2):16263             |
| MK_1900       | Philippines                   | ERR298776          | Chewapreecha et al. Nat Microbiol 2017 (2):16263             |
| MK_441        | Philippines                   | ERR298773          | Chewapreecha et al. Nat Microbiol 2017 (2):16263             |
| MK_451        | Philippines                   | ERR298774          | Chewapreecha et al. Nat Microbiol 2017 (2):16263             |
| MK_453        | Philippines                   | ERR298775          | Chewapreecha et al. Nat Microbiol 2017 (2):16263             |
| F3253         | Puerto_Rico                   | ERR311035          | Chewapreecha et al. Nat Microbiol 2017 (2):16263             |
| H0929         | Puerto_Rico                   | ERR311039          | Chewapreecha et al. Nat Microbiol 2017 (2):16263             |
| MSHR6976      | Sabah(Malaysia)               | ERR298354          | Chewapreecha et al. Nat Microbiol 2017 (2):16263             |
| MSHR5107      | Sarawak, Malaysian Borneo     | JZXP00000000       | Podin et al., 2014 Antimicrob Agents Chemother 58 (1), 162-6 |
| Bp22          | Singapore                     | CM001156, CM001157 | Nandi et al., 2010 PLoS Pathog 6(4): E1000845                |
| MSHR6975      | Singapore                     | ERR298353          | Chewapreecha et al. Nat Microbiol 2017 (2):16263             |
| S13           | Singapore                     | AAHW02000000       | Nandi et al., 2010 PLoS Pathog 6(4): E1000845                |
| 1426a         | Thailand                      | ERR162622          | Chewapreecha et al. Nat Microbiol 2017 (2):16263             |
| 2614a         | Thailand                      | ERR162612          | Chewapreecha et al. Nat Microbiol 2017 (2):16263             |
| 2632a         | Thailand                      | ERR162625          | Chewapreecha et al. Nat Microbiol 2017 (2):16263             |
| 2659a         | Thailand                      | ERR162614          | Chewapreecha et al. Nat Microbiol 2017 (2):16263             |
| 2667a         | Thailand                      | ERR162615          | Chewapreecha et al. Nat Microbiol 2017 (2):16263             |
| 2698a         | Thailand                      | ERR162620          | Chewapreecha et al. Nat Microbiol 2017 (2):16263             |
| 2719a         | Thailand                      | ERR162619          | Chewapreecha et al. Nat Microbiol 2017 (2):16263             |
| 2767a         | Thailand                      | ERR162613          | Chewapreecha et al. Nat Microbiol 2017 (2):16263             |
| 2769a         | Thailand                      | ERR162621          | Chewapreecha et al. Nat Microbiol 2017 (2):16263             |
| 2774a         | Thailand                      | ERR162618          | Chewapreecha et al. Nat Microbiol 2017 (2):16263             |

|               |                            |                      |                                                             |
|---------------|----------------------------|----------------------|-------------------------------------------------------------|
| 2820a         | Thailand                   | ERR162617            | Chewapreecha et al. Nat Microbiol 2017 (2):16263            |
| 2833a         | Thailand                   | ERR162624            | Chewapreecha et al. Nat Microbiol 2017 (2):16263            |
| 995a          | Thailand                   | ERR162623            | Chewapreecha et al. Nat Microbiol 2017 (2):16263            |
| A-277-02-2-10 | Thailand                   | ERR343795            | Chewapreecha et al. Nat Microbiol 2017 (2):16263            |
| A-278-05-2-01 | Thailand                   | ERR343796            | Chewapreecha et al. Nat Microbiol 2017 (2):16263            |
| A-281-02-2-01 | Thailand                   | ERR343806            | Chewapreecha et al. Nat Microbiol 2017 (2):16263            |
| A-281-02-2-02 | Thailand                   | ERR343807            | Chewapreecha et al. Nat Microbiol 2017 (2):16263            |
| A-281-02-2-05 | Thailand                   | ERR343810            | Chewapreecha et al. Nat Microbiol 2017 (2):16263            |
| A-282-02-1-02 | Thailand                   | ERR343816            | Chewapreecha et al. Nat Microbiol 2017 (2):16263            |
| A-294-05-2-03 | Thailand                   | ERR343837            | Chewapreecha et al. Nat Microbiol 2017 (2):16263            |
| E361          | Thailand                   | ERR162626            | Chewapreecha et al. Nat Microbiol 2017 (2):16263            |
| HB PUB10134a  | Thailand                   | CP008911, CP008912   | Daligault et al., Genome Announc 2014 2(6):e01106-14        |
| HB PUB10303a  | Thailand                   | CP008893, CP008894   | Daligault et al., Genome Announc 2014 2(6):e01106-14        |
| K96243        | Thailand                   | NC_006350, NC_006351 | Holden et al., Proc Natl Acad Sci USA 2004 101(39):14240-45 |
| 1106a         | Ubon Ratchathani, Thailand | CP008758, CP008759   | Daligault et al., Genome Announc 2014 2(6):e01106-14        |
| 1106b         | Ubon Ratchathani, Thailand | CM000774, CM000775   | Nandi et al., 2010 PLoS Pathog 6(4): E1000845               |
| 1710a         | Ubon Ratchathani, Thailand | CM000832, CM000833   | Nandi et al., 2010 PLoS Pathog 6(4): E1000845               |
| 1710b         | Ubon Ratchathani, Thailand | CP000124, CP000125   | Nandi et al., 2010 PLoS Pathog 6(4): E1000845               |
| D4899         | Venezuela                  | ERR351981            | Chewapreecha et al. Nat Microbiol 2017 (2):16263            |
| 137           | Vietnam                    | ERR178256            | Chewapreecha et al. Nat Microbiol 2017 (2):16263            |
| 532           | Vietnam                    | ERR178258            | Chewapreecha et al. Nat Microbiol 2017 (2):16263            |
| 683           | Vietnam                    | ERR178259            | Chewapreecha et al. Nat Microbiol 2017 (2):16263            |
| 720           | Vietnam                    | ERR178260            | Chewapreecha et al. Nat Microbiol 2017 (2):16263            |
| 1040          | Vietnam                    | ERR178261            | Chewapreecha et al. Nat Microbiol 2017 (2):16263            |
| 1042          | Vietnam                    | ERR178262            | Chewapreecha et al. Nat Microbiol 2017 (2):16263            |
| 1043          | Vietnam                    | ERR178263            | Chewapreecha et al. Nat Microbiol 2017 (2):16263            |
| 1062          | Vietnam                    | ERR178264            | Chewapreecha et al. Nat Microbiol 2017 (2):16263            |
| 1072          | Vietnam                    | ERR178265            | Chewapreecha et al. Nat Microbiol 2017 (2):16263            |
| 1080          | Vietnam                    | ERR178266            | Chewapreecha et al. Nat Microbiol 2017 (2):16263            |
| 1095          | Vietnam                    | ERR178267            | Chewapreecha et al. Nat Microbiol 2017 (2):16263            |
| 1097          | Vietnam                    | ERR178268            | Chewapreecha et al. Nat Microbiol 2017 (2):16263            |
| 1258          | Vietnam                    | ERR178269            | Chewapreecha et al. Nat Microbiol 2017 (2):16263            |
| MSHR6970      | Vietnam                    | ERR298348            | Chewapreecha et al. Nat Microbiol 2017 (2):16263            |

|            |                |                 |                                                   |
|------------|----------------|-----------------|---------------------------------------------------|
| MSHR6971   | Vietnam        | ERR298349       | Chewapreecha et al. Nat Microbiol 2017 (2):16263  |
| MSHR6972   | Vietnam        | ERR298350       | Chewapreecha et al. Nat Microbiol 2017 (2):16263  |
| MSHR6973   | Vietnam        | ERR298351       | Chewapreecha et al. Nat Microbiol 2017 (2):16263  |
| MSHR6974   | Vietnam        | ERR298352       | Chewapreecha et al. Nat Microbiol 2017 (2):16263  |
| H065460522 | Virgin Islands | ERR298778       | Chewapreecha et al. Nat Microbiol 2017 (2):16263  |
| MSHR8441   | Thailand       | NZ_JYBK00000000 | Viberg et al., Genome Announc 2015 3(2):e00254-15 |

**Table S2-** Median physico-chemical water parameters, drain descriptions and detection of *B. pseudomallei* in water samples at each of the 40 sites.

| Site ID | District              | pH   | EC (µS/cm) | Temp (C°) | Nitrate (mg/L) | ORP (mV) | TDS (ppm) | Turbidity (FNU) | DO (mg/L) | <i>E. coli</i> (CFU/ml) | Coliforms (CFU/ml) | Cement lined | Shaded | <i>B. pseudomallei</i> detected in water |
|---------|-----------------------|------|------------|-----------|----------------|----------|-----------|-----------------|-----------|-------------------------|--------------------|--------------|--------|------------------------------------------|
| 1       | Sisattanak District   | 7.3  | 89         | 29.2      | 11             | 125.5    | 244       | 121             | 1.2       | 0                       | 0                  | No           | No     | Yes                                      |
| 2       | Sisattanak District   | 7.3  | 411        | 29.1      | 14             | -109.5   | 106       | 18.3            | 1.8       | 0                       | 5                  | Yes          | No     | No                                       |
| 3       | Sisattanak District   | 7.4  | 540        | 29        | 16             | 45.3     | 69        | 14.6            | 0.8       | 1                       | 12                 | No           | No     | Yes                                      |
| 4       | Sisattanak District   | 7.04 | 431        | 28.3      | 14             | -57.2    | 115       | 29.1            | 0         | 0                       | 5                  | No           | Yes    | Yes                                      |
| 5       | Sisattanak District   | 7    | 387        | 27        | 17             | 136.6    | 192       | 267             | 3.2       | 0                       | 3                  | No           | Yes    | Yes                                      |
| 6       | Sisattanak District   | 7.1  | 245        | 26.3      | 12             | 28.4     | 123       | 57.9            | 2.5       | 0                       | 9                  | No           | No     | Yes                                      |
| 7       | Sisattanak District   | 6.6  | 345        | 27.4      | 16             | -5.2     | 173       | 40.5            | 3         | 0                       | 3                  | No           | No     | Yes                                      |
| 8       | Sisattanak District   | 6.8  | 338        | 28.6      | 12             | 36       | 169       | 25.2            | 2.2       | 0                       | 3                  | No           | No     | Yes                                      |
| 9       | Xaysetha District     | 7.1  | 406        | 28.2      | 13             | 10.2     | 203       | 26.3            | 1.2       | 0                       | 60                 | No           | No     | Yes                                      |
| 10      | Sisattanak District   | 6.8  | 500        | 26.9      | 11             | -78.1    | 249       | 105             | 0.5       | 1                       | 27                 | Yes          | No     | Yes                                      |
| 11      | Sisattanak District   | 6.7  | 551        | 27.6      | 14             | -59.6    | 276       | 80.5            | 0.9       | 0                       | 5                  | No           | Yes    | Yes                                      |
| 12      | Chantabuly District   | 8.1  | 290        | 27.9      | 11             | 95.1     | 145       | 9.5             | 0         | 0                       | 1                  | Yes          | Yes    | No                                       |
| 13      | Sisattanak District   | 7.3  | 412        | 28.9      | 16             | -52.6    | 215       | 115.2           | 2.4       | 0                       | 3                  | No           | Yes    | No                                       |
| 14      | Sisattanak District   | 6.8  | 298        | 30.6      | 17             | 30.1     | 149       | 143             | 3.2       | 0                       | 0                  | Yes          | Yes    | Yes                                      |
| 15      | Xaysetha District     | 7    | 465        | 27.4      | 23             | -33.3    | 132       | 69.2            | 0.6       | 0                       | 0                  | No           | No     | Yes                                      |
| 16      | Xaysetha District     | 7.2  | 397        | 28.1      | 11             | -56.7    | 198       | 123             | 2.2       | 6                       | 60                 | No           | No     | Yes                                      |
| 17      | Chanthabuly District  | 7.4  | 566        | 29.3      | 16             | -95.2    | 85        | 88              | 2.8       | 0                       | 2                  | No           | No     | No                                       |
| 18      | Xaysetha District     | 7    | 174        | 27.6      | 11             | 1.9      | 287       | 72.3            | 1.4       | 0                       | 11                 | No           | Yes    | Yes                                      |
| 19      | Xaysetha District     | 7.3  | 487        | 28.3      | 15             | -58.5    | 249       | 48.6            | 1.3       | 4                       | 24                 | No           | No     | Yes                                      |
| 20      | Xaysetha District     | 7.1  | 386        | 27.8      | 11             | 106.6    | 180       | 13.2            | 3.1       | 0                       | 8                  | No           | Yes    | Yes                                      |
| 21      | Xaythany District     | 7.1  | 251        | 29.3      | 13             | -134.9   | 146       | 34.5            | 3.2       | 1                       | 28                 | No           | No     | Yes                                      |
| 22      | Xaysetha District     | 6.9  | 276        | 29.8      | 12             | -13      | 135       | 131.2           | 3.5       | 0                       | 2                  | No           | No     | Yes                                      |
| 23      | Xaythany District     | 6.8  | 297        | 29.8      | 11             | -50.7    | 152       | 32.6            | 3         | 0                       | 2                  | No           | No     | Yes                                      |
| 24      | Xaythany District     | 6.8  | 171        | 29.7      | 14             | -14.2    | 181       | 42.3            | 2.4       | 0                       | 1                  | No           | Yes    | Yes                                      |
| 25      | Sikhottabong District | 7.2  | 856        | 29.8      | 16             | -81.6    | 198       | 92              | 0.5       | 140                     | 63                 | No           | No     | Yes                                      |



|    |                       |     |     |      |    |       |     |      |     |    |     |     |     |     |
|----|-----------------------|-----|-----|------|----|-------|-----|------|-----|----|-----|-----|-----|-----|
| 26 | Chanthabuly District  | 7.2 | 566 | 31.6 | 18 | -81.2 | 212 | 10   | 3.7 | 2  | 29  | No  | No  | Yes |
| 27 | Chanthabuly District  | 7.1 | 252 | 31.2 | 15 | 42.5  | 136 | 39.4 | 3.7 | 0  | 17  | No  | No  | Yes |
| 28 | Sikhottabong District | 6.9 | 396 | 31.8 | 19 | -73.4 | 121 | 59.5 | 4.1 | 9  | 29  | No  | No  | No  |
| 29 | Sikhottabong District | 7.2 | 418 | 30.7 | 13 | -77.5 | 209 | 13.8 | 4   | 8  | 40  | Yes | Yes | No  |
| 30 | Sikhottabong District | 7.2 | 232 | 30.4 | 10 | -34   | 116 | 31.6 | 2   | 0  | 0   | No  | No  | No  |
| 31 | Sikhottabong District | 6.9 | 84  | 30.8 | 10 | 117.3 | 42  | 24.2 | 1.9 | 0  | 0   | No  | No  | No  |
| 32 | Sikhottabong District | 6.6 | 155 | 29.6 | 8  | 52.1  | 78  | 33.8 | 2.5 | 0  | 7   | Yes | No  | No  |
| 33 | Chanthabuly District  | 7.3 | 532 | 29.4 | 15 | -75.3 | 165 | 34.8 | 2   | 14 | 57  | No  | No  | Yes |
| 34 | Sikhottabong District | 7.3 | 549 | 29.7 | 15 | -67.2 | 274 | 41.8 | 1.7 | 92 | 180 | No  | Yes | No  |
| 35 | Chanthabuly District  | 7   | 372 | 29.3 | 13 | -80.7 | 186 | 13   | 0.7 | 2  | 73  | Yes | Yes | No  |
| 36 | Chanthabuly District  | 7.1 | 384 | 31   | 13 | -64   | 191 | 100  | 0.9 | 1  | 5   | No  | No  | No  |
| 37 | Xaythany District     | 7.2 | 305 | 29.4 | 14 | 71.2  | 153 | 32.7 | 1.2 | 1  | 32  | No  | No  | Yes |
| 38 | Chanthabuly District  | 7.1 | 228 | 31.2 | 12 | 110   | 114 | 27.5 | 1.3 | 0  | 31  | Yes | No  | No  |
| 39 | Xaythany District     | 6.8 | 398 | 30.4 | 14 | -52.3 | 116 | 80   | 1.5 | 0  | 7   | No  | Yes | Yes |
| 40 | Chanthabuly District  | 7.3 | 543 | 31.1 | 15 | -53.5 | 171 | 28.9 | 1.8 | 7  | 23  | Yes | Yes | No  |

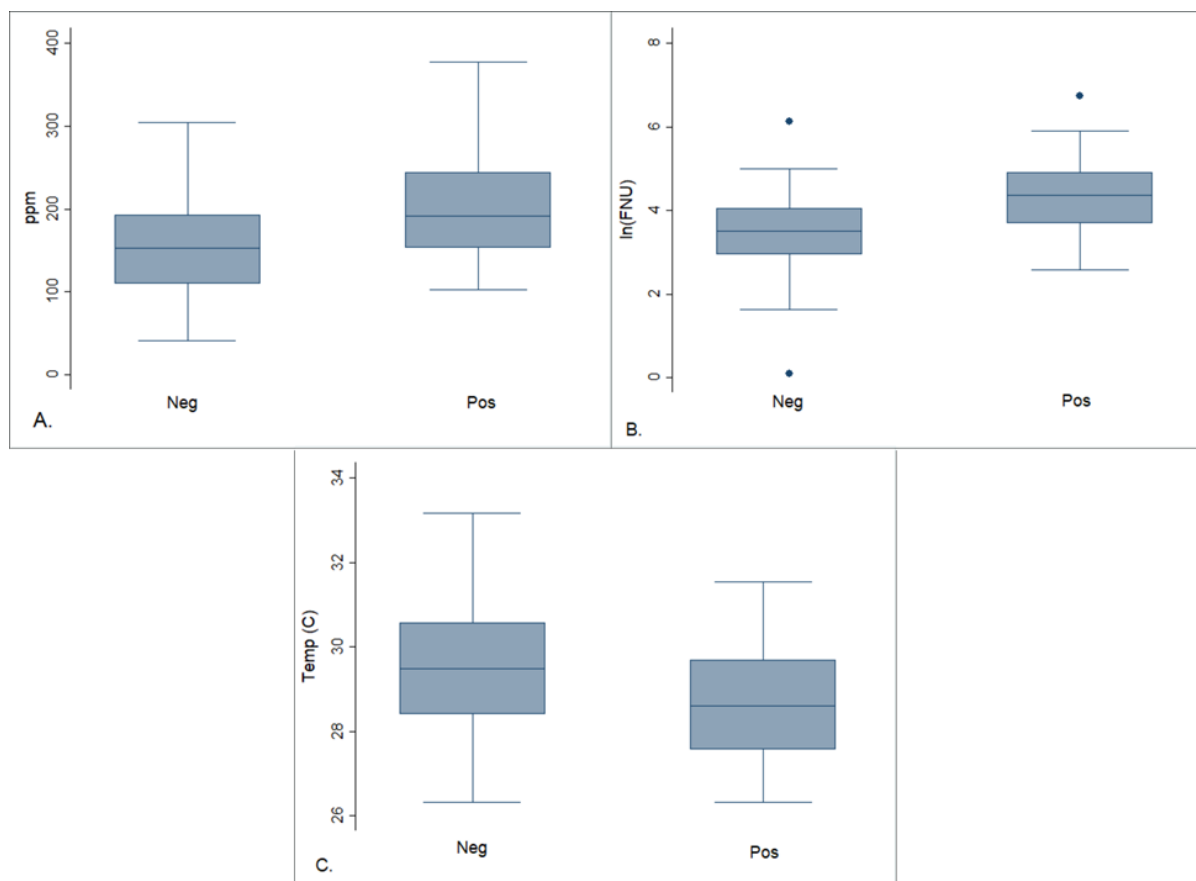

**Figure S1-** Box-and-whisker plots of significant univariable physico-chemical parameters from *B. pseudomallei*-negative (Neg) and positive (Pos) samples using a GEE model clustered by site. Box plots span the interquartile range of the data with the median marked by a vertical line. Outliers are denoted by solid blue circles. **(3A)** TDS (ppm) from positive and negative samples ( $p=0.002$ ), **(3B)** turbidity (log transformed  $\ln(\text{FNU})$ ) ( $p<0.001$ ), **(3C)** water temperature ( $^{\circ}\text{C}$ ) ( $p=0.005$ ).

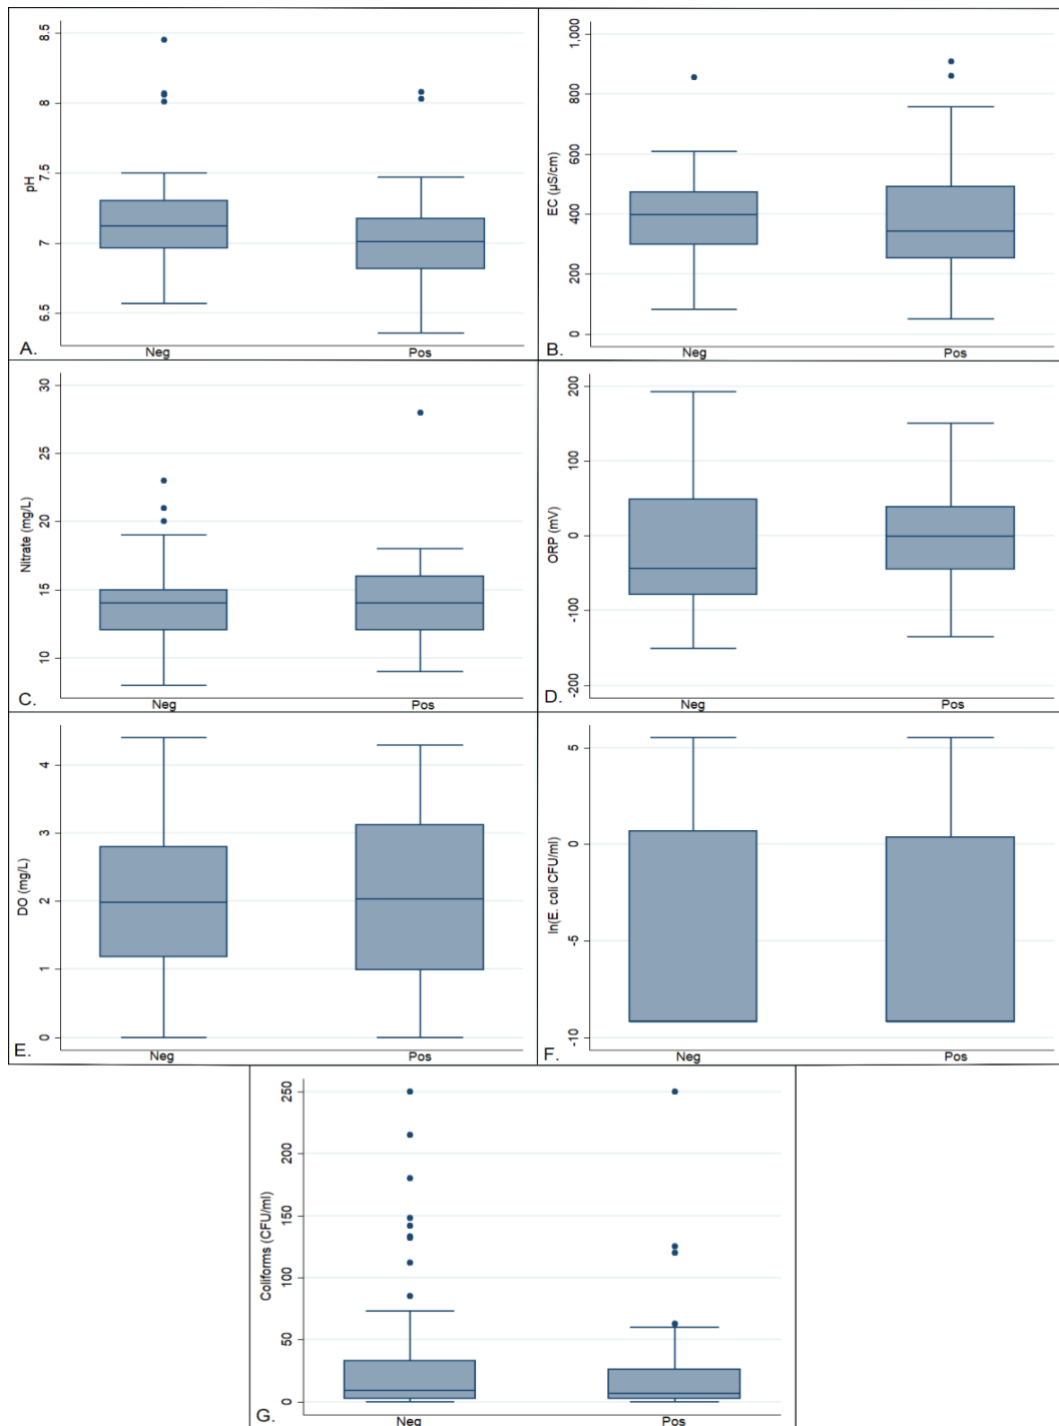

**Figure S2-** Box-and-whisker plots of non-significant ( $p > 0.05$ ) univariable water parameters from *B. pseudomallei*-negative (Neg) and positive (Pos) samples using a GEE model clustered by site. Box plots span the interquartile range of the data with the median marked by a vertical line. Outliers are denoted by solid blue circles. Box plots: pH (A.), EC (B.), Nitrate (C.), ORP (D.), DO (E.), *E. coli* (F.), and coliforms (G.).
